# Supplementary material for: New records of bats and terrestrial small mammals from the Seli River in Sierra Leone before the construction of a hydroelectric dam
Source: Biodivers Data J. 2019 Jun 18;7:e34754. doi: 10.3897/BDJ.7.e34754 (PMC6592978; doi:10.3897/BDJ.7.e34754)
Supplement: Supplementary material 3 — Rarefaction curve terrestrial small mammals [file bdj-07-e34754-s003.xlsx]

## Sheet: Tabelle1
Samples	Individuals	Species	SD
0	0	0	0
1	15.14	4.14	2.18
2	30.29	6.81	3.15
3	45.43	8.71	3.65
4	60.57	10.26	4.03
5	75.71	11.62	4.39
6	90.86	12.86	4.77
7	106	14	5.16
