# Supplementary material for: New records of bats and terrestrial small mammals from the Seli River in Sierra Leone before the construction of a hydroelectric dam
Source: Biodivers Data J. 2019 Jun 18;7:e34754. doi: 10.3897/BDJ.7.e34754 (PMC6592978; doi:10.3897/BDJ.7.e34754)
Supplement: Supplementary material 4 — Gazetteer of localities [file bdj-07-e34754-s004.xlsx]

## Sheet: Suppl4_Gazetteer_Weber_et_al
Gazetteer of localities
Bumbuna Phase I dam	09°04'17.4''N, 11°43'22.4''W
Bonthe	07°32'N, 12°30'W
Bunce Island	08°34'N, 13°02'W
Fadugu	09°23'N, 11°46'W
Fintonia (E of, Outamba-Kilimi NP)	09°40'N, 12°10'W
Freetown	08°30'N, 13°15'W
Kabala	09°35'N, 11°33'W
Kent	08°10'N, 13°10'W
Lake Sonfon	09°15'N, 11°31'W
Loma Mountains	09°13'N, 11°07'W
Makali (Kunine, Barina Chiefdom)	08°38'N, 11°40'W
Makeni	08°53'N, 12°03'W
Mongberi (near Bo)	08°19'N, 11°44'W
Musaia	09°45'N, 11°34'W
Njala	08°07'N, 12°05'W
Panguma (10 miles N)	08°17'N, 11°06'W
Mount Gangra, Mount Nimba, Liberia	07°32'N, 08°37'W
Wonegizi Mountains (Ziggida), Liberia	08°09'N, 09°28'W
Mount Béro Forest Reserve, Guinea	08°08'21.4''N, 08°34'21.4''W
